# Supplementary material for: Effect of medical student debt on mental health, academic performance and specialty choice: a systematic review
Source: PubMed Central journal article supplement — BMJ Open. 2019 Jul 2;9(7):e029980. doi: 10.1136/bmjopen-2019-029980 (PMC6609129; doi:10.1136/bmjopen-2019-029980), 2019-07-02
Supplement: bmjopen-2019-029980supp001.pdf [file bmjopen-2019-029980supp001.pdf]

### **Full Search String**

Databases Searched: PubMed, Medline, Embase, Scopus, and PsychInfo

Search string: PubMed

("students, medical"[MeSH Terms] OR ("students"[All Fields] AND "medical"[All Fields]) OR "medical students"[All Fields] OR ("medical"[All Fields] AND "student"[All Fields]) OR "medical student"[All Fields]) AND Debt[All Fields]
